# Supplementary material for: Cullin 4B Ubiquitin Ligase Is Important for Cell Survival and Regulates TGF-β1 Expression in Pleural Mesothelioma
Source: MDPI journal article supplement (doi:10.3390/ijms241713410), 2023-08-29
Supplement: s1 [file s1]

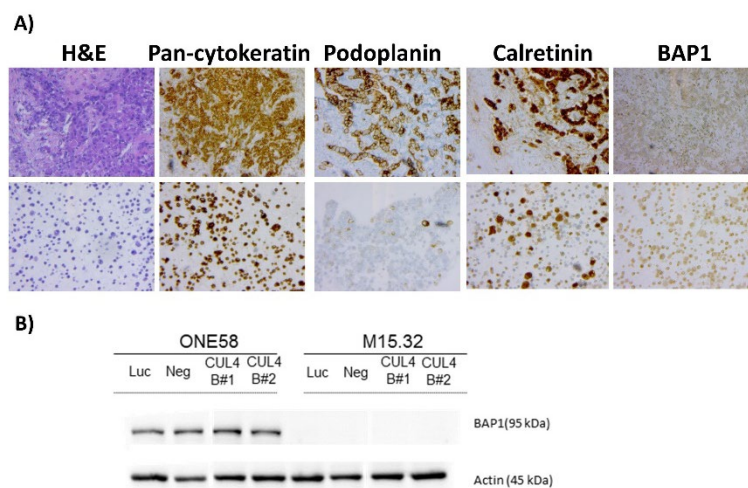

**Supplementary figure S1 A)** Immunohistochemical staining of PM markers in primary cells cultivated from pleural effusion of a PM patient (M15.32, lower panel) compared to the tumor tissue (upper panel). **B)** Western blot analysis showing BAP1 loss in M15.32. ONE58 was used as a positive control for BAP1 staining.

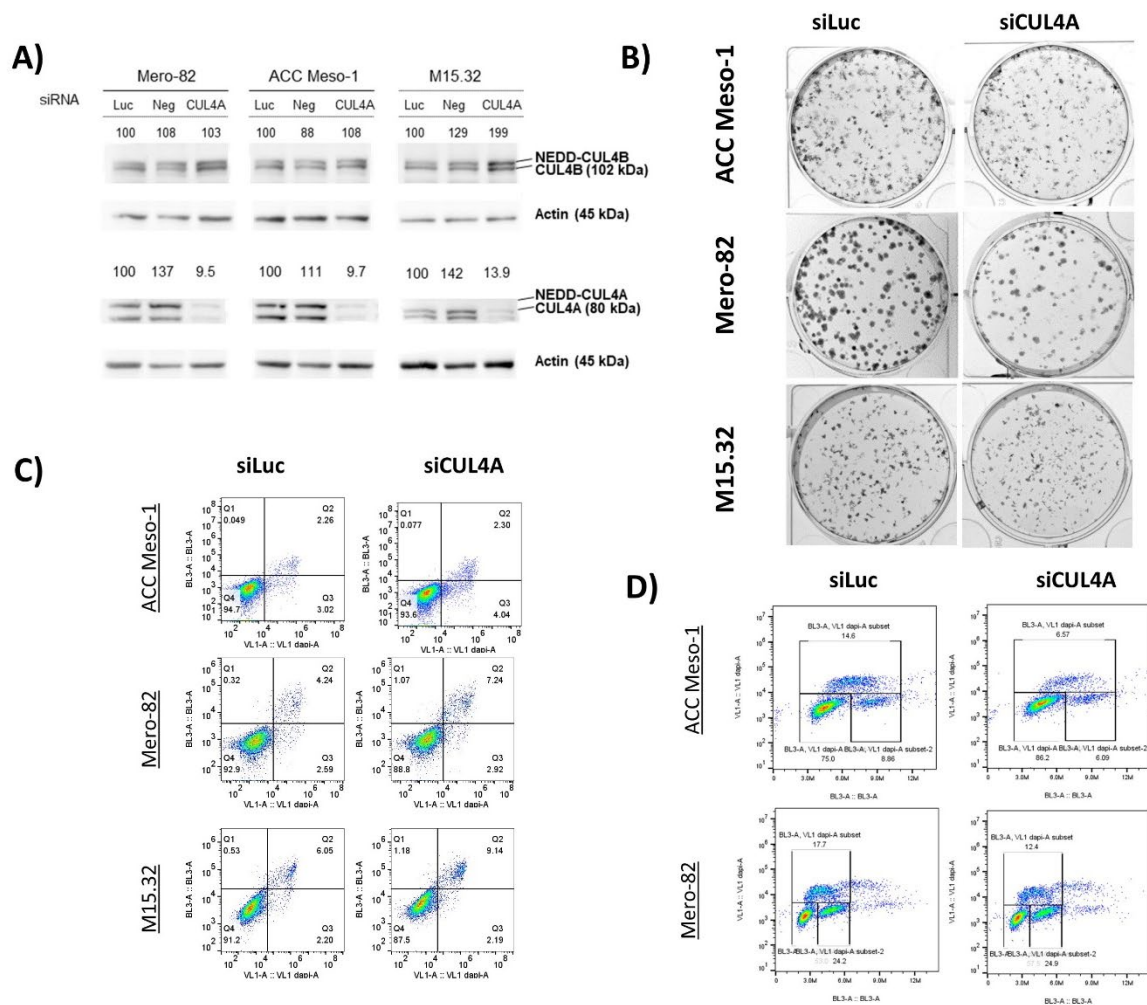

**Supplementary figure 2 A)** Efficacy of siCUL4A analyzed by western blot. CUL4B protein level was upregulated following CUL4A knockdown. **B)** Reduced colony formation of the cell lines after CUL4A knockdown. Flow cytometry showing increased cell death and apoptosis (**C**) and reduced cell proliferation (S phase) by EdU incorporation assay.

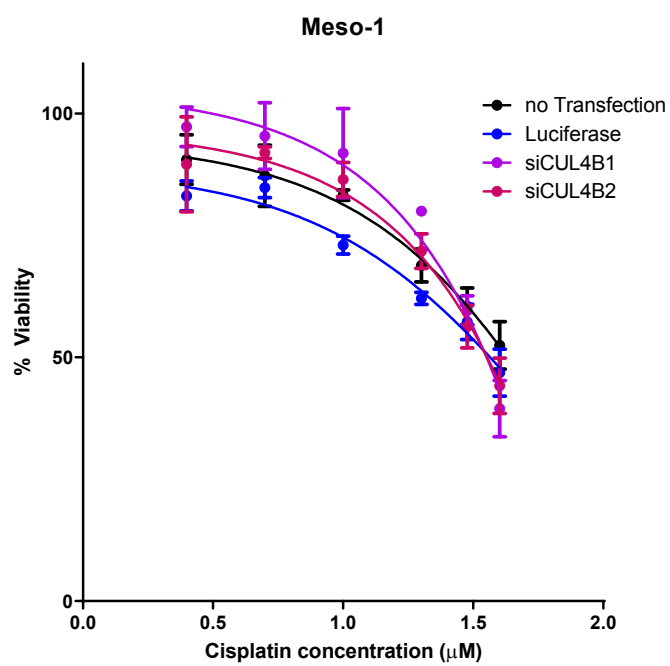

**Supplementary figure 3** Response of ACC Meso-1 to increasing concentration of cisplatin determined by viability MTT assay at 48 hours after drug exposure.

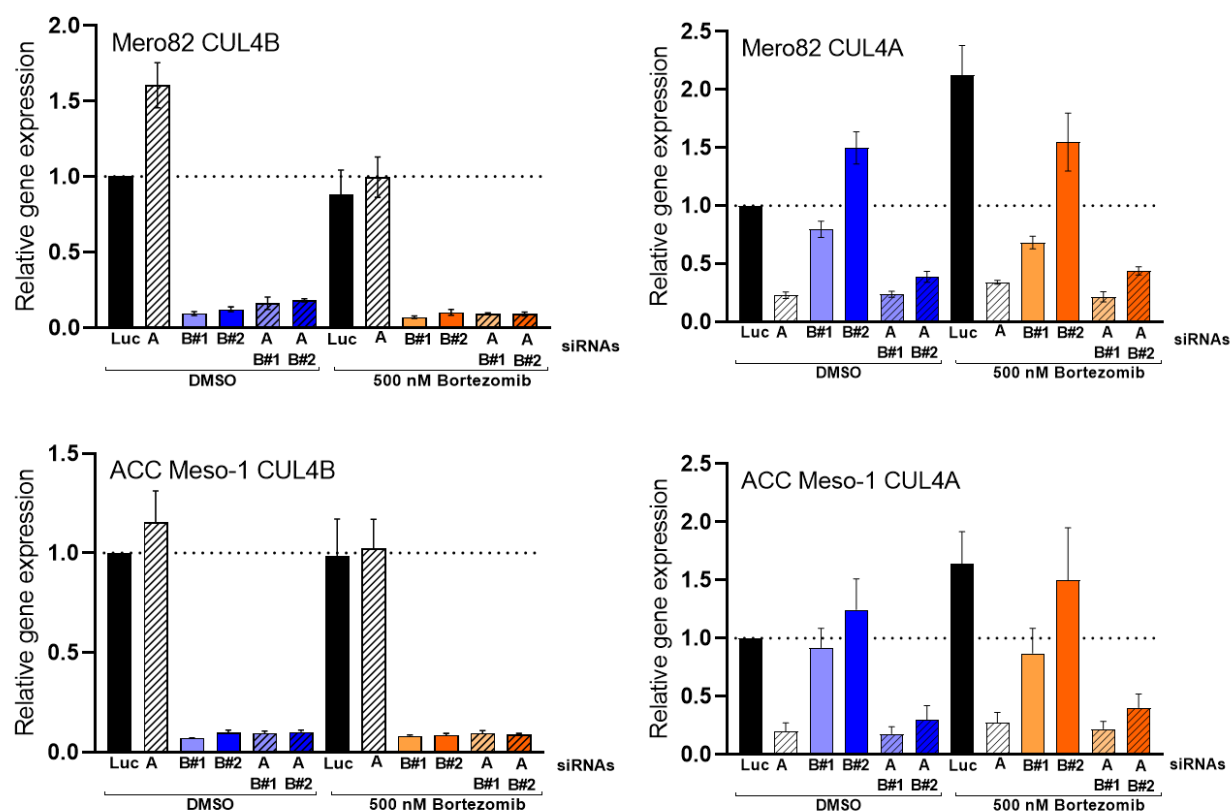

**Supplementary figure 4)** RT-qPCR showing knockdown efficiency of CUL4A and CUL4B with siRNAs, single and double knockdown for 48 hours, followed by treatment with DMSO control or 500 nM Bortezomib for additional 6 hours.

**Table 1:** siRNAs sequences and references

| Name                           | Gene       | Sequence Sense (5'-3')       | Modification Sense | Modification Antisense | References                                                                                                                                                                                                  |
|--------------------------------|------------|------------------------------|--------------------|------------------------|-------------------------------------------------------------------------------------------------------------------------------------------------------------------------------------------------------------|
| Non-targeting control          | Luciferase | CGUACGCGGAUACUUCGATT         | dTdT               | dTdT                   | Microsynth; synthesized siRNAs Pre control                                                                                                                                                                  |
| CUL4A                          | CUL4A      | GAACCCAUAUUAUU<br>AGUGAUU    | rUrU               | rUrU                   | Lovejoy, C.A., et al., DDB1 maintains genome integrity through regulation of Cdt1. Mol Cell Biol, 2006. 26(21): p. 7977-90.                                                                                 |
| CUL4B_1                        | CUL4B      | AAGCCUAAAUUACCAGAAA          | TT overhange       | TT overhange           | Nakagawa, T. and Y. Xiong, X-linked mental retardation gene CUL4B targets ubiquitylation of H3K4 methyltransferase component WDR5 and regulates neuronal gene expression. Mol Cell, 2011. 43(3): p. 381-91. |
| CUL4B_2                        | CUL4B      | UAA ACC AGC UGA ACU UAU<br>A | dTdT               | dTdT                   | Designed by Microsynth                                                                                                                                                                                      |
| Non-targeting negative control | N/A        | AGGUAGUGUAAUCGCCUUGtt        | dTdT               | dTdT                   | Microsynth; synthesized siRNAs Pre control                                                                                                                                                                  |

**Table 2:** Sequences for RT-qPCR primers

| Gene                   | Sequence 5'-3' FW      | Sequence 5'-3' RE      |
|------------------------|------------------------|------------------------|
| B-Actin                | GGACCTGACTGACTACCTCAT  | CGTAGCACAGCTTCTCCTTAAT |
| B-Actin human specific | CCTCGCCTTTGCCGATCC     | CGCGGCGATATCATCATCC    |
| CUL4B                  | GGACATGGGACTGGAGTTATTT | ACCATTCCTTCCCTCTCAATC  |
| CUL4A                  | CAGGCACAGATCCTTCCGTT   | TCCTGCCAGCACGTGTTAAT   |
| YAP                    | CAGACAGTGGACTAAGCATGAG | CAGGGTGCTTTGGTTGATAGTA |
| CTGF                   | GCCCAGACCCAACTATGATTAG | GGAGGCGTTGTCATTGGTAA   |
| Survivin               | GCACCACTTCCAGGGTTTAT   | AGGAGCACAGTTGAAACATCTA |
